# Supplementary material for: Degradable flexible piezoelectric nanogenerator based on two-dimensional barium titanate nanosheets and polylactic acid
Source: Royal Society of Chemistry journal article supplement (doi:10.1039/d2qm01380k), 2023-01-01
Supplement: d2qm01380k1.pdf [file d2qm01380k1.pdf]

## *Supporting information*

### **Degradable flexible piezoelectric nanogenerator based on two-dimensional barium titanate nanosheets and polylactic acid**

Bo Zhao,<sup>a</sup> Yao Su,<sup>a</sup> Ruixuan Xue,<sup>a</sup> Yan Wang,<sup>a</sup> Lei Miao,<sup>b</sup> Minggang Yao,<sup>c</sup> Han Yu,<sup>\*\*a</sup>  
Weixing Zhao,<sup>a</sup> and Dengwei Hu,<sup>\*a</sup>

a. Faculty of Chemistry and Chemical Engineering, Engineering Research Center of Advanced Ferroelectric Functional Materials, Key Laboratory of Functional Materials of Baoji, Baoji University of Arts and Sciences, 1 Hi-Tech Avenue, Baoji, Shaanxi, 721013, China. E-mail: [dwhu@bjwlyx.edu.cn](mailto:dwhu@bjwlyx.edu.cn), [yuhan@bjwlyx.edu.cn](mailto:yuhan@bjwlyx.edu.cn).

b. Lab. of Environmental Inorganic Materials Chemistry, Institute of Multidisciplinary Research for Advanced Materials, Tohoku University, 2-1-1, Katahira, Aoba-Ku, Sendai 980-8577, Japan.

c. Shaanxi Aerospace Times Navigation Equipment Co, Ltd. Baoji, Shaanxi, 721013, China.

\* Corresponding author

E-mail address: [dwhu@bjwlyx.edu.cn](mailto:dwhu@bjwlyx.edu.cn) (Dengwei Hu), [yuhan@bjwlyx.edu.cn](mailto:yuhan@bjwlyx.edu.cn) (Han, Yu).

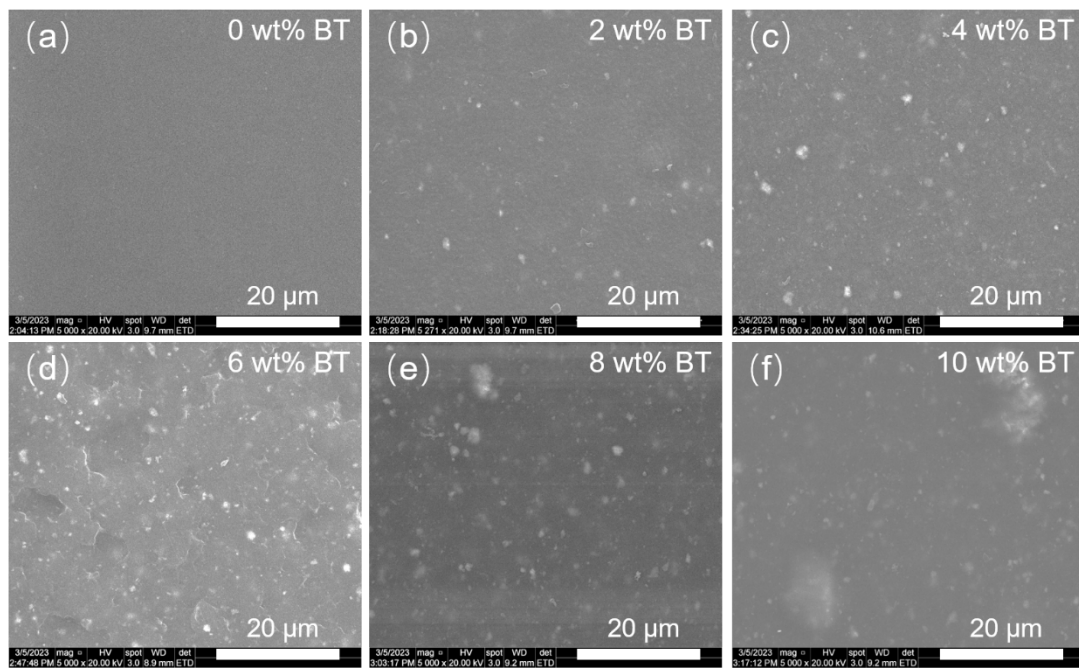

**Fig. S1.** SEM images of 2D BT/PLA nanocomposite film surfaces with 2D BT content of (a) 0 wt%, (b) 2 wt%, (c) 4 wt%, (d) 6 wt%, (e) 8 wt% and (f) 10 wt%

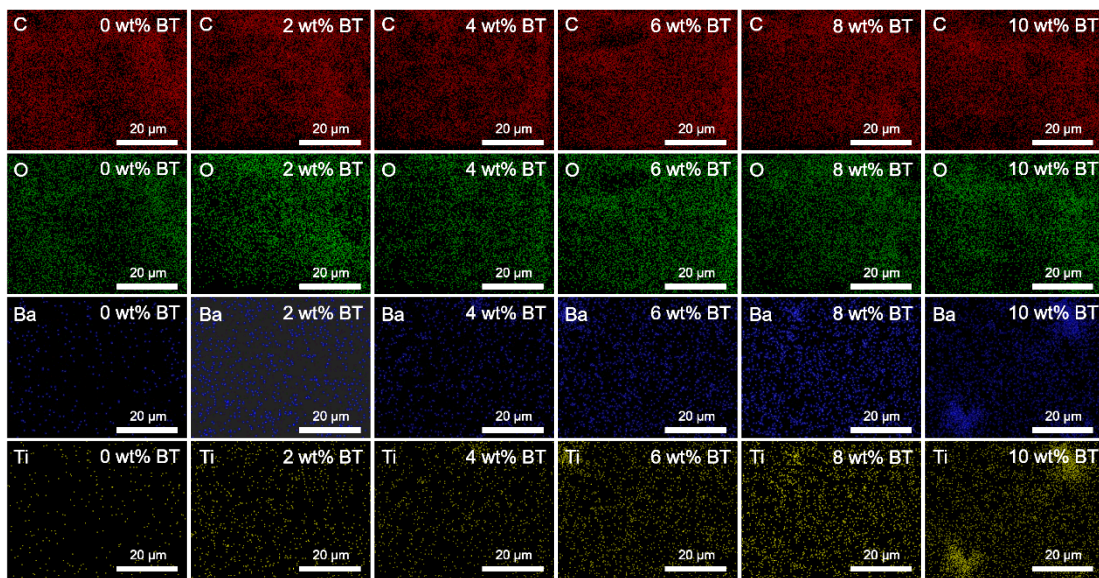

**Fig. S2.** EDS elemental mapping images of 2D BT/PLA nanocomposite films with different BT contents.

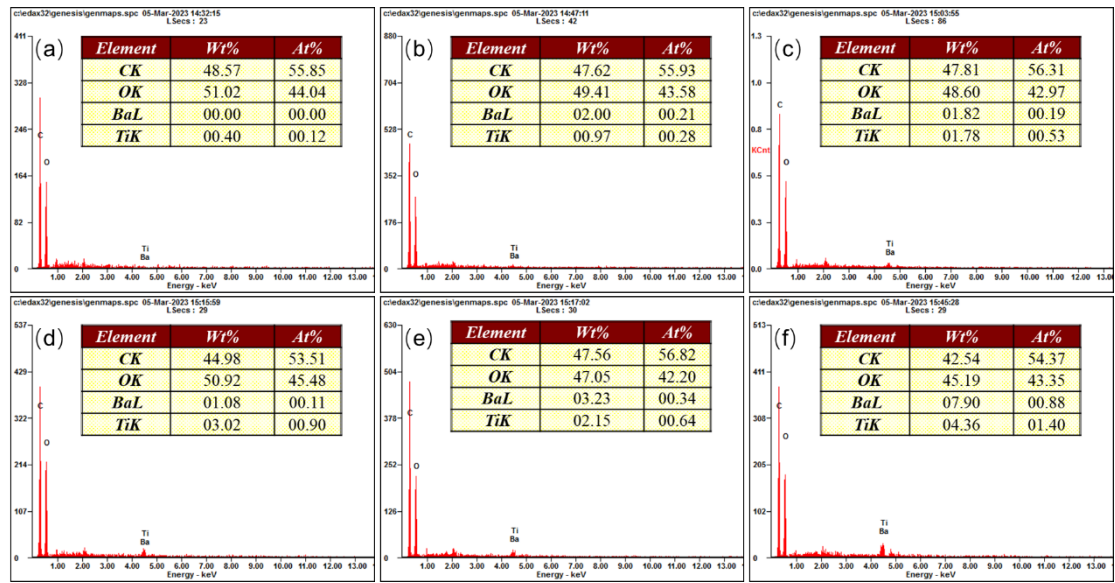

**Fig. S3.** EDS spectra of two-dimensional BT/PLA nanocomposite film surfaces with (a) 0 wt%, (b) 2 wt%, (c) 4 wt%, (d) 6 wt%, (e) 8 wt% and (f) 10 wt% of two-dimensional BT.

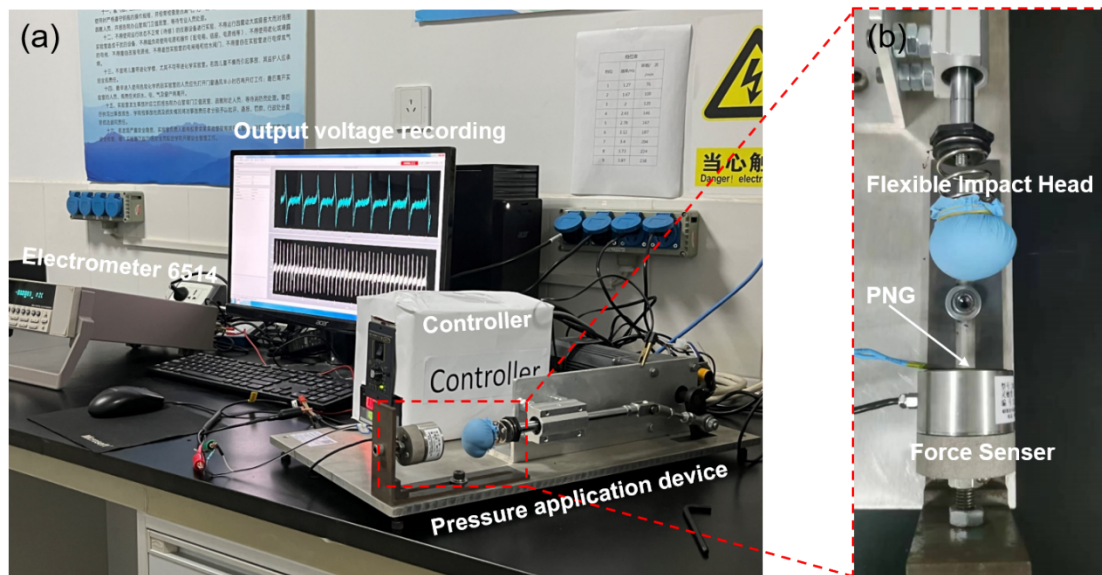

**Fig. S4.** (a) shows a physical view of the piezoelectric test system, and (b) shows an enlarged view of part of the details of (a).
